# Supplementary material for: Clustering effects on the reactivity of alkoxy radicals: rate coefficients of 3(RO⋯OR) complexes accounting for multiple conformers
Source: Royal Society of Chemistry journal article supplement (doi:10.1039/d5cp04635a), 2026-04-17
Supplement: d5cp04635a1.pdf [file d5cp04635a1.pdf]

## Supplementary Information for

### Clustering effects on the reactivity of alkoxy radicals: Rate coefficients of $^3(\text{RO}\cdots\text{OR})$ complexes accounting for multiple conformers

Hongye Fraise Zhao<sup>†</sup>, Lauri Franzon<sup>†</sup>, Severi Juttula<sup>†</sup>, Robert Skog<sup>†</sup>, Nanna Myllys<sup>†</sup> and Theo Kurtén<sup>†\*</sup>

<sup>†</sup>*Department of Chemistry, University of Helsinki, A.I. Virtasen aukio 1 (Chemicum), 00560, Helsinki, Finland.*

<sup>\*</sup>*E-mail: theo.kurten@helsinki.fi*

## Contents

|                                                                                                   |           |
|---------------------------------------------------------------------------------------------------|-----------|
| <b>S1 Notations applied throughout the Supplementary Information (SI)</b>                         | <b>2</b>  |
| <b>S2 Binding energies of the four alkoxy complexes in this study</b>                             | <b>3</b>  |
| <b>S3 Schematic representation of the conformer sampling workflow</b>                             | <b>4</b>  |
| <b>S4 Evaluations on the multireference character of the studied alkoxy systems</b>               | <b>5</b>  |
| <b>S5 Relative energy values involved in this study</b>                                           | <b>8</b>  |
| S5.1 Relative energy values of key stationary points . . . . .                                    | 8         |
| S5.2 Relative energy values of all conformers . . . . .                                           | 11        |
| <b>S6 Supporting data for the AceO system</b>                                                     | <b>17</b> |
| S6.1 Energy barriers of post- $\beta$ -scission processes . . . . .                               | 17        |
| S6.2 Comparison between the TS H-shift conformers reported in this and previous studies . . . . . | 17        |
| <b>S7 Supporting data for the <math>\beta</math>-ISOPO system</b>                                 | <b>18</b> |
| S7.1 Energy barriers of possible reaction channels . . . . .                                      | 18        |
| S7.2 Hydrogen bonds in isolated $\beta$ -ISOPO $^{\bullet}$ and in the complex . . . . .          | 19        |

# S1 Notations applied throughout the Supplementary Information (SI)

For clarity and succinctness, Table S1 summarizes the simplified notations of the types of conformers, computational methods and energy terms employed throughout the SI, complementing Table 2 in the main text.

**Table S1** Simplified notations of conformers, computational methods and parameters in SI.

| Notation in SI                | Detailed descriptions                                                                                                                                                                                                                                                                                                                                                                                                                      |
|-------------------------------|--------------------------------------------------------------------------------------------------------------------------------------------------------------------------------------------------------------------------------------------------------------------------------------------------------------------------------------------------------------------------------------------------------------------------------------------|
| Conformer ( $G_{\min}$ )      | The conformer with the lowest Gibbs free energy value ( $G_{\min}$ ) within its category, identified by the conformer sampling workflow (see Section 2 in the main text).                                                                                                                                                                                                                                                                  |
| Conformer (IRC)               | The conformer which corresponds to an endpoint of the intrinsic reaction coordinate (IRC) calculation. IRC calculations were performed on the transition state conformers with the lowest $G$ values.                                                                                                                                                                                                                                      |
| Reactant monomer or "rm"      | An isolated $\text{RO}^{\bullet}$ radical.                                                                                                                                                                                                                                                                                                                                                                                                 |
| TS monomer or "tsm"           | A transition state conformer of intramolecular $\text{RO}^{\bullet}$ reactions.                                                                                                                                                                                                                                                                                                                                                            |
| Reactant dimer, "2rm" or "rd" | A triplet alkoxy complex, $^3(\text{RO} \cdots \text{OR})$ .                                                                                                                                                                                                                                                                                                                                                                               |
| TS H-shift conformer          | A transition state conformer of the intermolecular H-shift reaction of $^3(\text{RO} \cdots \text{OR})$ , which involves both $\text{RO}^{\bullet}$ in the complex.                                                                                                                                                                                                                                                                        |
| TS dimer or "1rm1ts"          | A transition state conformer of other intramolecular reaction channels of $^3(\text{RO} \cdots \text{OR})$ , which takes place within one $\text{RO}^{\bullet}$ of the complex.                                                                                                                                                                                                                                                            |
| Product monomer or "pcm"      | A product complex conformer of reactions in an isolated $\text{RO}^{\bullet}$ , obtained from IRC calculations.                                                                                                                                                                                                                                                                                                                            |
| Product dimer or "pcd"        | A product complex conformer of reactions in $^3(\text{RO} \cdots \text{OR})$ , obtained from IRC calculations.                                                                                                                                                                                                                                                                                                                             |
| $f(\text{DFT})$               | Values calculated at the $\omega\text{B97X-D3/ma-def2-TZVP (DefGrid3)}$ level of theory, where $f$ can be an energy term ( $E$ ) or frequency ( $\omega_i$ ). This level of theory is also denoted " $\omega\text{B97X-D3 (Grid3)}$ " for simplicity.                                                                                                                                                                                      |
| $f(\text{CC})$                | If not specified, it refers to values calculated at the $\text{UHF-DLPNO-CCSD(T)-F12/cc-pVDZ-F12}$ level of theory, where $f$ can be an energy term, diagnostic (e.g. $T_1$ , $\%TAE_e(T)$ ) or other parameters (e.g. $\langle S^2 \rangle$ , $\Delta\langle S^2 \rangle\%$ ). This level of theory is also denoted " $\text{DLPNO-CCSD(T)-F12}$ " for simplicity. For cases specified with "ROHF" or "pure-UHF", see Sections S4 and S5. |
| $E_{\text{el}}$               | Electronic energy                                                                                                                                                                                                                                                                                                                                                                                                                          |
| $E_{\text{elzc}}$             | Zero-point corrected electronic energy                                                                                                                                                                                                                                                                                                                                                                                                     |
| $G$                           | Gibbs free energy                                                                                                                                                                                                                                                                                                                                                                                                                          |
| $D$                           | Dissociation energy of a complex                                                                                                                                                                                                                                                                                                                                                                                                           |
| $\Delta_b E$                  | The energy barrier of a reaction ( $\Delta_b E = E_{\text{TS}} - E_{\text{Reactant}}$ ), which reflects the kinetic feasibility of the reaction.                                                                                                                                                                                                                                                                                           |
| $\Delta_r E$                  | Reaction energy ( $\Delta_r E = E_{\text{Product}} - E_{\text{Reactant}}$ ), which reflects the thermodynamic feasibility of the reaction.                                                                                                                                                                                                                                                                                                 |

## S2 Binding energies of the four alkoxy complexes in this study

The binding energies ( $D$ ) of four  ${}^3(\text{RO}\cdots\text{OR})$  were calculated using Equation 1, with notations defined in Table S1. The  $D_{\text{elzc}}$  values at  $\omega\text{B97X-D3}$  (Grid3) and DLPNO-CCSD(T)-F12 levels are reported in Table S2.

$$D_{\text{elzc}} = 2E_{\text{elzc}}(\text{Reactant monomer } (G_{\text{min}})) - E_{\text{elzc}}(\text{Reactant dimer } (G_{\text{min}})) \quad (1)$$

**Table S2** Binding energies of the four  ${}^3(\text{RO}\cdots\text{OR})$ , reported in  $\text{kcal mol}^{-1}$ . Notations are defined in Table S1.

| ${}^3(\text{RO}\cdots\text{OR})$                         | $D_{\text{elzc}}(\text{DFT})$ | $D_{\text{elzc}}(\text{CC})$ |
|----------------------------------------------------------|-------------------------------|------------------------------|
| ${}^3(\text{AceO}\cdots\text{OAce})$                     | 6.09                          | 6.21                         |
| ${}^3(\beta\text{-ISOPO}\cdots\beta\text{-ISOPO})$       | 7.96                          | 6.52                         |
| ${}^3(\text{PhCH}_2\text{O}\cdots\text{OCH}_2\text{Ph})$ | 7.28                          | 6.53                         |
| ${}^3(\text{PhC(O)O}\cdots\text{O(O)CPh})$               | 7.38                          | 6.00                         |

### S3 Schematic representation of the conformer sampling workflow

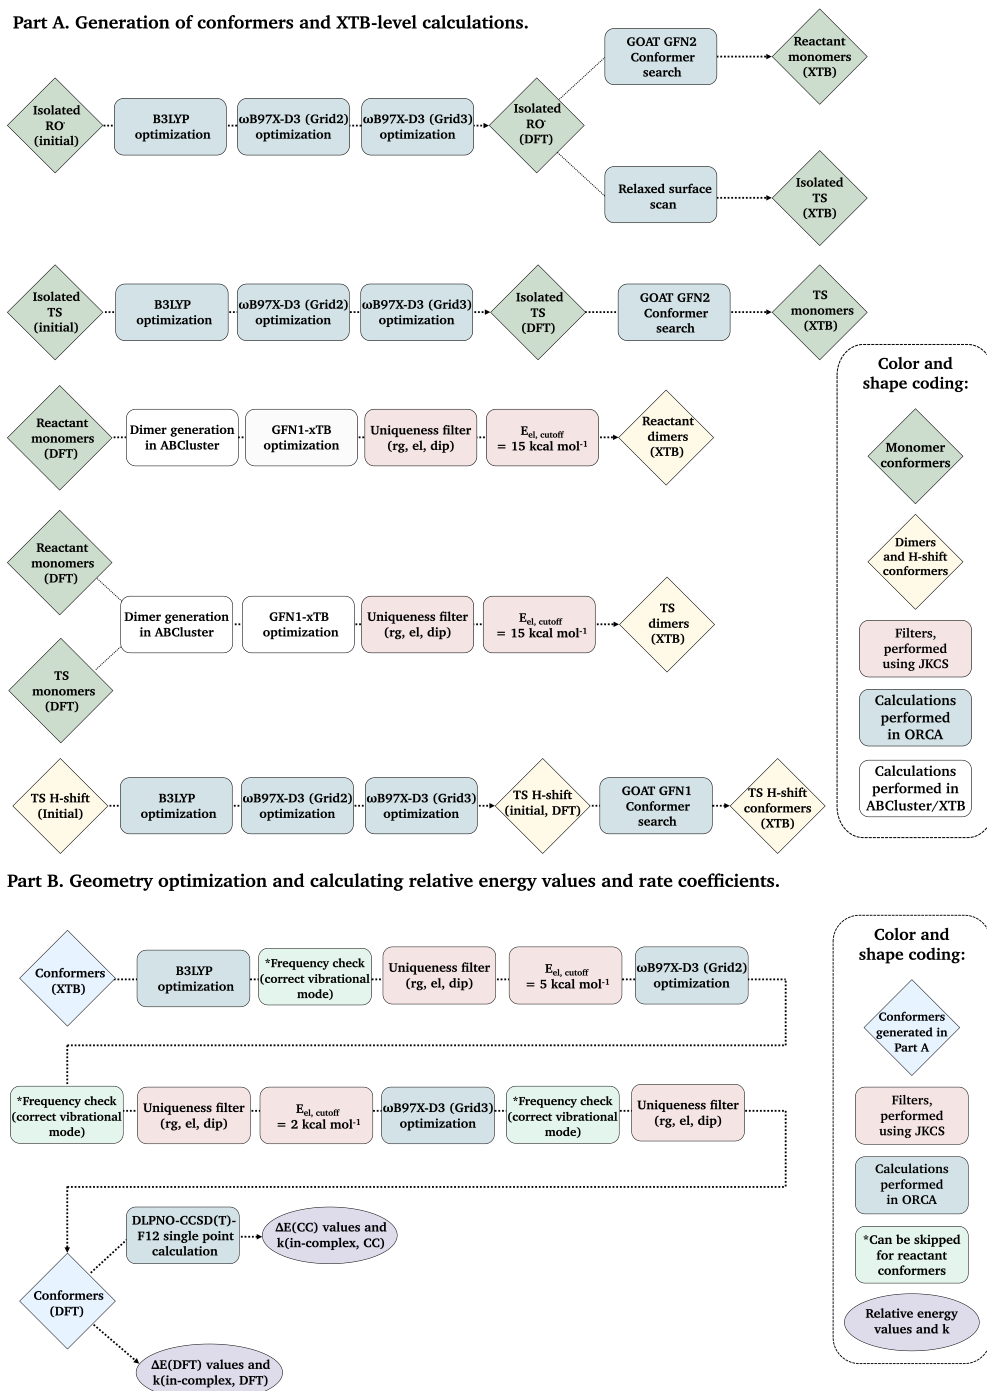

**Figure S1** Schematic representation of the conformer sampling workflow. Part A shows the processes including generation the initial structures, conformer search using ABCluster or GOAT, and optimization and filtering at the GFN $n$ -xTB ( $n=1$  or 2) level. Part B shows the optimization and filtering processes after the XTB-level calculations. The color and shape coding panels are listed in the right side of each part.

## S4 Evaluations on the multireference character of the studied alkoxy systems

To evaluate the multireference character of the four alkoxy systems in this study, we computed the  $T_1$  and  $\%TAE_e(T)$  diagnostics of significant stationary points, and also examined their spin contamination ( $\langle S^2 \rangle$  and  $\Delta\langle S^2 \rangle\%$ ). Those stationary points include the lowest- $G$  TS conformers from the sampling workflow, as well as the IRC endpoints which correspond to the reactants and products of each reaction channel.

In practice, IRC calculations were performed (in both directions) on the lowest- $G$  TS conformers, and the endpoints were then optimized at the  $\omega$ B97X-D3 (Grid3) level, followed by DLPNO-CCSD(T)-F12 single-point calculations on the optimized structures. The  $T_1$  values were extracted from the coupled-cluster output files. We also computed an energy-based diagnostic,  $\%TAE_e(T)$ , which is complementary to the more commonly used  $T_1$ .

Conventionally, if a closed-shell organic system has  $T_1 < 0.02$ , predictions using single-reference methods are expected to be reliable.<sup>1,2</sup> However, previous studies have suggested that relying on the  $T_1$  diagnostic alone may be insufficient for evaluating the multireference character.<sup>3,4</sup> Therefore, we also computed the  $\%TAE_e(T)$  values as a complementary, energy-based diagnostic.

By definition, the total electronic atomization energy ( $TAE_e$ ) of an organic compound  $C_xH_yO_z$  can be calculated by Equation 2, where  $M$  stands for the CCSD or CCSD(T) method.<sup>5</sup> The  $\%TAE_e(T)$  diagnostic is then calculated using Equation 3.<sup>6</sup>

$$TAE_{e,M}(C_xH_yO_z) = xE_{el}[M](C) + yE_{el}[M](H) + zE_{el}[M](O) - E_{el}[M](C_xH_yO_z) \quad (2)$$

$$\%TAE_e(T)(C_xH_yO_z) = 100 \times \frac{TAE_e[CCSD(T)](C_xH_yO_z) - TAE_e[CCSD](C_xH_yO_z)}{TAE_e[CCSD(T)](C_xH_yO_z)} \quad (3)$$

Karton et al.<sup>6</sup> have suggested the following criteria for the  $\%TAE_e(T)$  diagnostic: Systems with  $\%TAE_e(T) < 2\%$  are generally dominated by dynamical correlations, which are usually well-described by single-reference methods. On the other hand, systems with  $\%TAE_e(T) > 10\%$  exhibit severe nondynamical correlations, and multireference methods are recommended.

In addition to  $T_1$  and  $\%TAE_e(T)$  diagnostics, we also examined the spin contamination ( $\langle S^2 \rangle$ ) of key conformers, as we employed the unrestricted Hartree-Fock (UHF) type wavefunction as the reference for DLPNO-CCSD(T)-F12 calculations. Spin contamination has been a common problem for UHF treatments, as it may distort the shape of the potential energy surface and, consequently, affect the coupled-cluster energies.<sup>2</sup> Therefore, we extracted the  $\langle S^2 \rangle$  values from the output files and computed their deviation percentage from the pure spin state ( $\Delta\langle S^2 \rangle\%$ ) using Equation 4.<sup>7</sup> It is commonly accepted that if  $\Delta\langle S^2 \rangle\% < 10\%$ , the spin contamination is negligible.<sup>8</sup>

$$\Delta\langle S^2 \rangle\% = \frac{\langle S^2 \rangle - S(S+1)}{S(S+1)} \quad (4)$$

The  $T_1$ , %TAE<sub>e</sub>( $T$ ),  $\langle S^2 \rangle$  and  $\Delta\langle S^2 \rangle\%$  values of lowest- $G$  conformers and IRC endpoints in this study are reported in Table S3. For the  $\omega$ B97X-D3 (Grid3) calculations, the spin contamination is minor ( $\Delta\langle S^2 \rangle\%$ (DFT) < 10%) and thus not reported here.

**Table S3**  $T_1$  and %TAE<sub>e</sub>( $T$ ) diagnostics and spin contamination indicators of key conformers in this study. Parameters were calculated at the DLPNO-CCSD(T)-F12 level of theory. Alkoxy systems and reaction channels are presented in bold.

| Conformer Type                                                             | $T_1$  | %TAE <sub>e</sub> ( $T$ ) | $\langle S^2 \rangle$ | $\Delta\langle S^2 \rangle\%$ |
|----------------------------------------------------------------------------|--------|---------------------------|-----------------------|-------------------------------|
| <b>AceO, <math>\beta</math>-scission, free radical</b>                     |        |                           |                       |                               |
| Reactant monomer <sup>a</sup>                                              | 0.0250 | 1.57                      | 0.76                  | 1.5%                          |
| TS monomer ( $G_{\min}$ )                                                  | 0.0215 | 1.89                      | 0.88                  | 16.7%                         |
| Product monomer (IRC)                                                      | 0.0188 | 1.73                      | 0.77                  | 3.2%                          |
| <b>AceO, <math>\beta</math>-scission, in-complex<sup>b</sup></b>           |        |                           |                       |                               |
| Reactant dimer ( $G_{\min}$ )                                              | 0.0207 | 1.73                      | 2.09                  | 4.6%                          |
| Reactant dimer (IRC)                                                       | 0.0253 | 1.63                      | 2.03                  | 1.3%                          |
| TS dimer ( $G_{\min}$ )                                                    | 0.0207 | 1.73                      | 2.09                  | 4.6%                          |
| Product dimer (IRC)                                                        | 0.0206 | 1.68                      | 2.04                  | 2.1%                          |
| <b>AceO, Intermolecular H-shift<sup>b</sup></b>                            |        |                           |                       |                               |
| Reactant dimer (IRC)                                                       | 0.0261 | 1.65                      | 2.03                  | 1.3%                          |
| TS H-shift conformer ( $G_{\min}$ )                                        | 0.0283 | 1.79                      | 2.04                  | 1.9%                          |
| Product dimer (IRC)                                                        | 0.0261 | 1.76                      | 2.08                  | 4.1%                          |
| <b><math>\beta</math>-ISOPO, <math>\beta</math>-scission, free radical</b> |        |                           |                       |                               |
| Reactant monomer <sup>a</sup>                                              | 0.0162 | 1.41                      | 0.76                  | 1.8%                          |
| TS monomer ( $G_{\min}$ )                                                  | 0.0211 | 1.61                      | 0.91                  | 21.9%                         |
| Product monomer (IRC)                                                      | 0.0162 | 1.46                      | 0.76                  | 1.6%                          |
| <b><math>\beta</math>-ISOPO, <math>\beta</math>-scission, in-complex</b>   |        |                           |                       |                               |
| Reactant dimer ( $G_{\min}$ )                                              | 0.0180 | 1.45                      | 2.05                  | 2.3%                          |
| Reactant dimer (IRC)                                                       | 0.0180 | 1.45                      | 2.05                  | 2.3%                          |
| TS dimer ( $G_{\min}$ )                                                    | 0.0189 | 1.54                      | 2.17                  | 8.7%                          |
| Product dimer (IRC)                                                        | 0.0161 | 1.46                      | 2.09                  | 4.5%                          |
| <b>PhCH<sub>2</sub>O, Epoxy formation, free radical</b>                    |        |                           |                       |                               |
| Reactant monomer ( $G_{\min}$ )                                            | 0.0146 | 1.67                      | 1.14                  | 51.9%                         |
| Reactant monomer (IRC)                                                     | 0.0141 | 1.68                      | 1.17                  | 56.5%                         |
| TS monomer ( $G_{\min}$ )                                                  | 0.0195 | 1.90                      | 1.33                  | 77.5%                         |
| Isolated epoxy radical <sup>a</sup>                                        | 0.0186 | 1.78                      | 1.18                  | 56.7%                         |
| <b>PhCH<sub>2</sub>O, Epoxy formation, in-complex<sup>b</sup></b>          |        |                           |                       |                               |
| Reactant dimer ( $G_{\min}$ )                                              | 0.0148 | 1.70                      | 2.75                  | 37.3%                         |
| Reactant dimer (IRC)                                                       | 0.0147 | 1.71                      | 2.85                  | 42.3%                         |
| TS dimer ( $G_{\min}$ )                                                    | 0.0173 | 1.82                      | 2.96                  | 48.1%                         |
| Epoxy-PhCH <sub>2</sub> O complex (IRC)                                    | 0.0171 | 1.76                      | 2.83                  | 41.4%                         |
| <b>PhCH<sub>2</sub>O, Epoxy decomposition, free radical</b>                |        |                           |                       |                               |
| Isolated epoxy radical <sup>a</sup>                                        | 0.0186 | 1.78                      | 1.18                  | 56.7%                         |
| TS monomer ( $G_{\min}$ )                                                  | 0.0186 | 1.87                      | 1.33                  | 78.0%                         |
| Product monomer (IRC)                                                      | 0.0135 | 1.72                      | 1.14                  | 51.9%                         |
| <b>PhCH<sub>2</sub>O, Epoxy decomposition, in-complex</b>                  |        |                           |                       |                               |
| Epoxy-PhCH <sub>2</sub> O complex ( $G_{\min}$ )                           | 0.0170 | 1.76                      | 2.82                  | 41.2%                         |

Continued on next page

Continued from previous page

| Conformer Type                                               | $T_1$  | %TAE <sub>e</sub> ( $T$ ) | $\langle S^2 \rangle$ | $\Delta \langle S^2 \rangle$ % |
|--------------------------------------------------------------|--------|---------------------------|-----------------------|--------------------------------|
| Epoxy-PhCH <sub>2</sub> O complex (IRC)                      | 0.0170 | 1.75                      | 2.83                  | 41.4%                          |
| TS dimer ( $G_{\min}$ )                                      | 0.0168 | 1.80                      | 2.97                  | 48.4%                          |
| Product dimer (IRC)                                          | 0.0143 | 1.73                      | 2.78                  | 39.1%                          |
| <b>PhCH<sub>2</sub>O, Intermolecular H-shift<sup>c</sup></b> |        |                           |                       |                                |
| Reactant dimer (IRC)                                         | 0.0154 | 1.68                      | 2.78                  | 38.9%                          |
| TS H-shift conformer ( $G_{\min}$ )                          | 0.0181 | 1.79                      | 2.86                  | 42.9%                          |
| Product dimer (IRC, ROHF-UHF) <sup>c</sup>                   | 0.0172 | 1.76                      | 2.96                  | 47.8%                          |
| Product dimer (IRC, pure-UHF) <sup>d</sup>                   | 0.0368 | 1.88                      | 2.58                  | 28.9%                          |
| <b>PhC(O)O, <math>\beta</math>-scission, free radical</b>    |        |                           |                       |                                |
| Reactant monomer <sup>e</sup>                                | 0.0364 | 2.15                      | 1.20                  | 59.5%                          |
| TS monomer ( $G_{\min}$ )                                    | 0.0167 | 2.24                      | 1.32                  | 75.4%                          |
| Product monomer (IRC)                                        | 0.0157 | 2.01                      | 1.32                  | 76.5%                          |
| <b>PhC(O)O, <math>\beta</math>-scission, in-complex</b>      |        |                           |                       |                                |
| Reactant dimer ( $G_{\min}$ )                                | 0.0360 | 2.18                      | 2.85                  | 42.5%                          |
| Reactant dimer (IRC)                                         | 0.0336 | 2.13                      | 2.85                  | 42.5%                          |
| TS dimer ( $G_{\min}$ )                                      | 0.0285 | 2.23                      | 3.01                  | 50.7%                          |
| Product dimer (IRC)                                          | 0.0286 | 2.08                      | 3.01                  | 50.6%                          |

<sup>a</sup> The conformer obtained from IRC has the same geometry as the one identified in the sampling workflow (RMSD < 0.01 Å), and are thus not labeled with brackets.

<sup>b</sup> For reactions labeled "c" within each system, we selected the same "Reactant dimer ( $G_{\min}$ )" was selected as the zero of energy. Parameters of this conformer were reported only once to avoid redundancy.

<sup>c</sup> Results calculated using a UHF-type wavefunction generated from the ROHF-type orbitals, followed by coupled-cluster steps. (See Section S5.1 for detailed discussions.) This procedure is denoted "ROHF-UHF".

<sup>d</sup> Results calculated using a UHF-type wavefunction generated from a pure-UHF initial guess. This procedure is denoted "pure-UHF".

<sup>e</sup> The reactant monomer obtained from IRC showed nonphysical imaginary frequencies after DFT optimization. Instead, a reactant monomer with the same geometry (RMSD = 0.09 Å) was used here.

For the AceO and  $\beta$ -ISOPO systems, some  $T_1$  values exceed the 0.02 threshold, while all %TAE<sub>e</sub>( $T$ ) values are below 2%. The spin contamination of two TS  $\beta$ -scission monomers are larger than 10%, which is aligned with the feature that spin contamination in general increases as a bond is stretched<sup>2</sup>. In summary, single-reference calculations can be considered reliable for these two systems.

For the PhCH<sub>2</sub>O system, most  $T_1$  and %TAE<sub>e</sub>( $T$ ) values fall below the 0.02 and 2% thresholds, except for the entry denoted "Product dimer (IRC, pure-UHF)" in Table S3. We believe that for the intermolecular H-shift product dimer (<sup>3</sup>(PhCH<sub>2</sub>OH · · · PhCHO)), the solution obtained by the pure-UHF treatment is an artifact, as discussed in Section S5.1. In addition, some conformers have  $T_1$  and %TAE<sub>e</sub>( $T$ ) values close to the thresholds, suggesting that nondynamical correlations may play a more important role in the PhCH<sub>2</sub>O system compared to typical single-reference systems.

In contrast, the PhC(O)O system is even more affected by nondynamical correlations, especially for the in-complex  $\beta$ -scission reaction, where both  $T_1$  and %TAE<sub>e</sub>( $T$ ) values are above the thresholds. Therefore, rate coefficients computed at the DLPNO-CCSD(T)-F12 level for this system should be considered as more qualitative than quantitative.

## S5 Relative energy values involved in this study

In this section, the relative energy values were calculated using the following equation:

$$\Delta E = E_i - E_{\text{Reactant}(G_{\min})} \quad (5)$$

where  $i$  refers to reactant, TS or product conformers;  $\text{Reactant}(G_{\min})$  refers to the reactant conformer with the lowest  $G$  value, which was identified by the conformer sampling workflow; and  $E$  represents  $E_{\text{el}}$ ,  $E_{\text{elzc}}$  or  $G$  (see Table S1). All the energy values are reported in  $\text{kcal mol}^{-1}$ .

### S5.1 Relative energy values of key stationary points

As discussed in Section S4, the DLPNO-CCSD(T)-F12 results of all IRC endpoints allows us to estimate the upper limit of reaction (free) energies ( $\Delta_r E$ , see Table S1), as a more thorough sampling of product conformers would likely decrease the  $\Delta_r E$  values rather than increase them.

However, we identified a problem when computing the DLPNO-CCSD(T)-F12 energies of  $^3(\text{PhCH}_2\text{OH} \cdots \text{PhCHO})$ , which corresponds to the product dimer of the intermolecular H-shift reaction in the  $\text{PhCH}_2\text{O}$  system.

Originally, we applied the default settings in ORCA 6.0.1 for the initial guess (i.e. the model potential method<sup>9</sup>, as implied in our output files) and a UHF-type wavefunction as the reference for subsequent coupled-cluster calculations. This procedure is denoted "pure-UHF". According to Table S4, when pure-UHF treatment was applied to compute coupled-cluster energies, this conformer lies around  $30 \text{ kcal mol}^{-1}$  higher than the lowest- $G$  reactant dimer. In contrast, at the same level of theory, the sum of isolated product molecules ( $^1(\text{PhCH}_2\text{OH})$  and  $^3(\text{PhCHO})$ ) lies over  $14 \text{ kcal mol}^{-1}$  below the reactant dimer. This would imply that the product complex is unbound by more than  $40 \text{ kcal mol}^{-1}$  (see Equation 6 for computing the dissociation energy,  $D_{\text{elzc}}$ ), which is physically not reasonable.

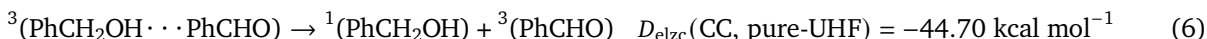

On the other hand, the DFT-level results show an internally consistent pattern, where the product complex lies about  $20 \text{ kcal mol}^{-1}$  below the reactant dimer, and  $7 \text{ kcal mol}^{-1}$  below the isolated products. One possible explanation to the discrepancy between DFT and coupled-cluster results is that the UHF calculation has converged on an artificial (local minimum) solution<sup>10</sup>, leading to spurious coupled-cluster energies. Moreover, the result employing pure-UHF treatment has the highest  $T_1$  value in this study ( $T_1 = 0.0368$ , see Table S3), which supports our hypothesis that its energy is associated with a large error.

As a test, we first computed the orbitals of  $^3(\text{PhCH}_2\text{OH} \cdots \text{PhCHO})$  using the restricted open-shell Hartree-Fock (ROHF) method. These ROHF-type orbitals were then used as the initial guess to generate a UHF-type wavefunction, which, after SCF convergence, served as the reference for subsequent coupled-cluster steps. This procedure is denoted "ROHF-UHF".

Surprisingly, introducing the ROHF orbitals led to a substantially lower absolute energy after the UHF calculation ( $E_{\text{post UHF}}(\text{ROHF-UHF}) = -688.1726 \text{ Hartree}$ ,  $E_{\text{post UHF}}(\text{only UHF}) = -688.0600 \text{ Hartree}$ , with a difference

of 70.62 kcal mol<sup>-1</sup>). As relaxing the restrictions on orbitals, i.e. shifting from ROHF to UHF, should lower the energy values instead of raising them, this observation strongly supports our hypothesis that the pure-UHF solution is an artificial local minimum, which is fortuitously avoided when ROHF orbitals are used to generate the initial guess. Furthermore, relative energies obtained from the ROHF-UHF procedure are internally consistent at the coupled-cluster level: The product complex lies below the reactant dimer, as well as below the isolated products ( $D_{\text{elzc}}(\text{CC}, \text{ROHF-UHF}) = 6.61 \text{ kcal mol}^{-1}$ ).

Finally, we note that the  $T_1$  diagnostic of the ROHF-UHF calculation is considerably lower ( $T_1 = 0.0172$ , see Table S3) than that of the pure-UHF calculation. This further suggests that the pure-UHF result is an artifact and can be safely discarded. Interestingly, the ROHF-UHF procedure also leads to increased spin contamination compared to the pure-UHF procedure ( $\langle S^2 \rangle(\text{ROHF-UHF}) = 2.96$ ,  $\langle S^2 \rangle(\text{pure-UHF}) = 2.58$ , see Table S3).

**Table S4** Relative energy values of the intermolecular H-shift reaction in <sup>3</sup>(PhCH<sub>2</sub>O...OCH<sub>2</sub>Ph). Notations are defined in Table S1.

| Conformer Type                                                          | $\Delta E_{\text{el}}(\text{DFT})$ | $\Delta E_{\text{el}}(\text{CC})$ | $\Delta E_{\text{elzc}}(\text{DFT})$ | $\Delta E_{\text{elzc}}(\text{CC})$ | $\Delta G(\text{DFT})$ | $\Delta G(\text{CC})$ |
|-------------------------------------------------------------------------|------------------------------------|-----------------------------------|--------------------------------------|-------------------------------------|------------------------|-----------------------|
| Reactant dimer ( $G_{\text{min}}$ )                                     | 0.00                               | 0.00                              | 0.00                                 | 0.00                                | 0.00                   | 0.00                  |
| Reactant dimer (IRC)                                                    | 4.62                               | 4.10                              | 3.93                                 | 3.41                                | 4.83                   | 4.31                  |
| TS H-shift conformer ( $G_{\text{min}}$ )                               | 8.95                               | 9.52                              | 7.40                                 | 7.96                                | 8.88                   | 9.44                  |
| Product dimer (IRC, pure-UHF) <sup>a</sup>                              | -18.04                             | 30.53                             | -17.03                               | 31.54                               | -16.82                 | 31.75                 |
| Product dimer (IRC, ROHF-UHF) <sup>b</sup>                              | -18.04                             | -20.77                            | -17.03                               | -19.77                              | -16.82                 | -19.55                |
| <sup>1</sup> (PhCH <sub>2</sub> OH) + <sup>3</sup> (PhCHO) <sup>c</sup> | -10.13                             | -13.47                            | -9.82                                | -13.16                              | -22.03                 | -25.37                |

<sup>a</sup> Results calculated using a UHF-type wavefunction generated from a pure-UHF initial guess. This procedure is denoted "pure-UHF".

<sup>b</sup> Results calculated using a UHF-type wavefunction generated from the ROHF-type orbitals, followed by coupled-cluster steps. This procedure is denoted "ROHF-UHF".

<sup>c</sup> Structures of isolated <sup>1</sup>(PhCH<sub>2</sub>OH) and <sup>3</sup>(PhCHO) molecules were obtained from the product dimer and optimized at the  $\omega\text{B97X-D3}$  (Grid3) level. DLPNO-CCSD(T)-F12 calculations (with the pure-UHF procedure) were performed on top of the optimized structures. Relative energy values reported here are the sum of that of isolated <sup>1</sup>(PhCH<sub>2</sub>OH) and <sup>3</sup>(PhCHO).

The relative energy values of each reaction channel are reported in Table S5. Except for three channels of the PhCH<sub>2</sub>O system (free radical and in-complex epoxy formation reactions, which are both kinetically uncompetitive; and the free radical epoxy decomposition reaction, which is constrained by the prerequisite epoxy formation step), the studied reactions are either exothermic or close to thermoneutral. Therefore, thermodynamic feasibility is unlikely to be a major limiting factor for the reactions in this study.

**Table S5** Relative energy values of significant stationary points in this study. Notations are defined in Table S1. Alkoxy systems and reaction channels are presented in bold.

| Conformer Type                                                   | $\Delta E_{\text{el}}(\text{DFT})$ | $\Delta E_{\text{el}}(\text{CC})$ | $\Delta E_{\text{elzc}}(\text{DFT})$ | $\Delta E_{\text{elzc}}(\text{CC})$ | $\Delta G(\text{DFT})$ | $\Delta G(\text{CC})$ |
|------------------------------------------------------------------|------------------------------------|-----------------------------------|--------------------------------------|-------------------------------------|------------------------|-----------------------|
| <b>AceO, <math>\beta</math>-scission, free radical</b>           |                                    |                                   |                                      |                                     |                        |                       |
| Reactant monomer <sup>a</sup>                                    | 0.00                               | 0.00                              | 0.00                                 | 0.00                                | 0.00                   | 0.00                  |
| TS monomer ( $G_{\text{min}}$ )                                  | 7.57                               | 5.96                              | 6.54                                 | 4.93                                | 6.06                   | 4.44                  |
| Product monomer (IRC)                                            | 5.94                               | 2.55                              | 4.12                                 | 0.73                                | 1.79                   | -1.60                 |
| <b>AceO, <math>\beta</math>-scission, in-complex<sup>b</sup></b> |                                    |                                   |                                      |                                     |                        |                       |
| Reactant dimer ( $G_{\text{min}}$ )                              | 0.00                               | 0.00                              | 0.00                                 | 0.00                                | 0.00                   | 0.00                  |
| Reactant dimer (IRC)                                             | 1.60                               | 1.98                              | 1.64                                 | 2.03                                | 1.63                   | 2.02                  |

Continued on next page

Continued from previous page

| Conformer Type                                                             | $\Delta E_{el}$ (DFT) | $\Delta E_{el}$ (CC) | $\Delta E_{elzc}$ (DFT) | $\Delta E_{elzc}$ (CC) | $\Delta G$ (DFT) | $\Delta G$ (CC) |
|----------------------------------------------------------------------------|-----------------------|----------------------|-------------------------|------------------------|------------------|-----------------|
| TS dimer ( $G_{min}$ )                                                     | 6.23                  | 4.91                 | 5.04                    | 3.72                   | 4.88             | 3.56            |
| Product dimer (IRC)                                                        | 5.99                  | 3.52                 | 4.40                    | 1.94                   | 3.14             | 0.67            |
| <b>AceO, Intermolecular H-shift<sup>b</sup></b>                            |                       |                      |                         |                        |                  |                 |
| Reactant dimer (IRC)                                                       | 3.10                  | 3.34                 | 3.02                    | 3.26                   | 3.52             | 3.76            |
| TS H-shift conformer ( $G_{min}$ )                                         | 8.37                  | 9.96                 | 6.87                    | 8.46                   | 8.28             | 9.86            |
| Product dimer (IRC)                                                        | -27.89                | -26.98               | -26.22                  | -25.31                 | -25.54           | -24.63          |
| <b><math>\beta</math>-ISOPO, <math>\beta</math>-scission, free radical</b> |                       |                      |                         |                        |                  |                 |
| Reactant monomer <sup>a</sup>                                              | 0.00                  | 0.00                 | 0.00                    | 0.00                   | 0.00             | 0.00            |
| TS monomer ( $G_{min}$ )                                                   | 6.25                  | 7.06                 | 4.87                    | 5.68                   | 4.64             | 5.45            |
| Product monomer (IRC)                                                      | -5.49                 | -5.13                | -8.00                   | -7.65                  | -10.14           | -9.79           |
| <b><math>\beta</math>-ISOPO, <math>\beta</math>-scission, in-complex</b>   |                       |                      |                         |                        |                  |                 |
| Reactant dimer ( $G_{min}$ )                                               | 0.00                  | 0.00                 | 0.00                    | 0.00                   | 0.00             | 0.00            |
| Reactant dimer (IRC)                                                       | 0.01                  | 0.00                 | 0.00                    | -0.02                  | 0.00             | -0.02           |
| TS dimer ( $G_{min}$ )                                                     | 2.05                  | 2.14                 | 1.21                    | 1.30                   | 1.30             | 1.39            |
| Product dimer (IRC)                                                        | -3.81                 | -4.18                | -6.47                   | -6.83                  | -8.60            | -8.96           |
| <b>PhCH<sub>2</sub>O, Epoxy formation, free radical</b>                    |                       |                      |                         |                        |                  |                 |
| Reactant monomer ( $G_{min}$ )                                             | 0.00                  | 0.00                 | 0.00                    | 0.00                   | 0.00             | 0.00            |
| Reactant monomer (IRC)                                                     | 1.69                  | 0.99                 | 2.64                    | 1.93                   | 2.64             | 1.93            |
| TS monomer ( $G_{min}$ )                                                   | 12.99                 | 11.43                | 12.86                   | 11.30                  | 13.43            | 11.87           |
| Isolated epoxy radical <sup>a</sup>                                        | 10.35                 | 9.95                 | 10.67                   | 10.27                  | 11.23            | 10.83           |
| <b>PhCH<sub>2</sub>O, Epoxy formation, in-complex<sup>b</sup></b>          |                       |                      |                         |                        |                  |                 |
| Reactant dimer ( $G_{min}$ )                                               | 0.00                  | 0.00                 | 0.00                    | 0.00                   | 0.00             | 0.00            |
| Reactant dimer (IRC)                                                       | 2.67                  | 2.31                 | 3.11                    | 2.75                   | 3.14             | 2.78            |
| TS dimer ( $G_{min}$ )                                                     | 13.19                 | 11.78                | 12.56                   | 11.15                  | 12.85            | 11.44           |
| Epoxy-PhCH <sub>2</sub> O complex (IRC)                                    | 11.64                 | 11.21                | 11.46                   | 11.02                  | 11.92            | 11.48           |
| <b>PhCH<sub>2</sub>O, Epoxy decomposition, free radical</b>                |                       |                      |                         |                        |                  |                 |
| Isolated epoxy radical <sup>a</sup>                                        | 0.00                  | 0.00                 | 0.00                    | 0.00                   | 0.00             | 0.00            |
| TS monomer ( $G_{min}$ )                                                   | 10.79                 | 9.39                 | 9.54                    | 8.13                   | 9.48             | 8.07            |
| Product monomer (IRC)                                                      | -10.79                | -11.11               | -10.86                  | -11.17                 | -11.23           | -11.55          |
| <b>PhCH<sub>2</sub>O, Epoxy decomposition, in-complex</b>                  |                       |                      |                         |                        |                  |                 |
| Epoxy-PhCH <sub>2</sub> O complex ( $G_{min}$ )                            | 0.00                  | 0.00                 | 0.00                    | 0.00                   | 0.00             | 0.00            |
| Epoxy-PhCH <sub>2</sub> O complex (IRC)                                    | 0.72                  | 0.69                 | 0.73                    | 0.70                   | 0.36             | 0.34            |
| TS dimer ( $G_{min}$ )                                                     | 10.88                 | 9.32                 | 9.72                    | 8.16                   | 9.77             | 8.21            |
| Product dimer (IRC)                                                        | -10.83                | -11.06               | -10.57                  | -10.80                 | -10.62           | -10.85          |
| <b>PhCH<sub>2</sub>O, Intermolecular H-shift<sup>b</sup></b>               |                       |                      |                         |                        |                  |                 |
| Reactant dimer (IRC)                                                       | 4.62                  | 4.10                 | 3.93                    | 3.41                   | 4.83             | 4.31            |
| TS H-shift conformer ( $G_{min}$ )                                         | 8.95                  | 9.52                 | 7.40                    | 7.96                   | 8.88             | 9.44            |
| Product dimer (IRC, ROHF-UHF) <sup>c</sup>                                 | -18.04                | -20.77               | -17.03                  | -19.77                 | -16.82           | -19.55          |
| <b>PhC(O)O, <math>\beta</math>-scission, free radical</b>                  |                       |                      |                         |                        |                  |                 |
| Reactant monomer <sup>d</sup>                                              | 0.00                  | 0.00                 | 0.00                    | 0.00                   | 0.00             | 0.00            |
| TS monomer ( $G_{min}$ )                                                   | 9.35                  | 7.85                 | 8.03                    | 6.53                   | 7.53             | 6.03            |
| Product monomer (IRC)                                                      | -1.69                 | -5.04                | -2.89                   | -6.23                  | -5.21            | -8.55           |
| <b>PhC(O)O, <math>\beta</math>-scission, in-complex</b>                    |                       |                      |                         |                        |                  |                 |
| Reactant dimer ( $G_{min}$ )                                               | 0.00                  | 0.00                 | 0.00                    | 0.00                   | 0.00             | 0.00            |

Continued on next page

Continued from previous page

| Conformer Type         | $\Delta E_{el}$ (DFT) | $\Delta E_{el}$ (CC) | $\Delta E_{elzc}$ (DFT) | $\Delta E_{elzc}$ (CC) | $\Delta G$ (DFT) | $\Delta G$ (CC) |
|------------------------|-----------------------|----------------------|-------------------------|------------------------|------------------|-----------------|
| Reactant dimer (IRC)   | 3.79                  | 1.84                 | 3.55                    | 1.61                   | 3.54             | 1.60            |
| TS dimer ( $G_{min}$ ) | 9.62                  | 8.12                 | 8.37                    | 6.87                   | 7.90             | 6.40            |
| Product dimer (IRC)    | 3.98                  | -0.88                | 2.55                    | -2.31                  | 0.65             | -4.21           |

<sup>a</sup> The conformer obtained from IRC has the same geometry as the one identified in the sampling workflow (RMSD < 0.01 Å), and are thus not labeled with brackets.

<sup>b</sup> For reactions labeled "c" within each system, we selected the same "Reactant dimer ( $G_{min}$ )" was selected as the zero of energy. Energy values of this conformer were reported only once to avoid redundancy.

<sup>c</sup> Results calculated using a UHF-type wavefunction generated from the ROHF-type orbitals, followed by coupled-cluster steps. Results calculated from the "pure-UHF" procedure are listed in Table S4.

<sup>d</sup> The reactant monomer obtained from IRC showed nonphysical imaginary frequencies after DFT optimization. Instead, a reactant monomer with the same geometry (RMSD = 0.09 Å) was used here.

## S5.2 Relative energy values of all conformers

For conformers in the four studied alkoxy systems, their relative energy values at  $\omega$ B97X-D3 (Grid3) ("DFT") and DLPNO-CCSD(T)-F12 ("CC") levels are reported in Tables S6 — S10. The imaginary frequencies of TS conformers calculated at the DFT level ( $\omega_i$ (DFT)) are also reported in  $\text{cm}^{-1}$ .

**Table S6** Relative energy values and imaginary frequencies of the conformers of the AceO system. Notations are defined in Table S1.

| Conformer Name <sup>a</sup> | $\Delta E_{el}$ (DFT) | $\Delta E_{el}$ (CC) | $\Delta E_{elzc}$ (DFT) | $\Delta E_{elzc}$ (CC) | $\Delta G$ (DFT) | $\Delta G$ (CC) | $\omega_i$ (DFT) |
|-----------------------------|-----------------------|----------------------|-------------------------|------------------------|------------------|-----------------|------------------|
| rm_goatgfn2_02              | 0.00                  | 0.00                 | 0.00                    | 0.00                   | 0.00             | 0.00            | —                |
| rm_goatgfn2_03              | 3.42                  | 3.42                 | 3.51                    | 3.51                   | 3.54             | 3.54            | —                |
| tsm_goatgfn2_01             | 7.57                  | 5.96                 | 6.54                    | 4.93                   | 6.06             | 4.44            | -183.22          |
| tsm_goatgfn2_04             | 11.70                 | 10.09                | 10.61                   | 9.00                   | 10.19            | 8.57            | -230.41          |
| pcm_IRC_sci                 | 5.94                  | 2.55                 | 4.12                    | 0.73                   | 1.79             | -1.60           | —                |
| 2rm-2_24_65                 | 0.00                  | 0.00                 | 0.00                    | 0.00                   | 0.00             | 0.00            | —                |
| 2rm-2_22_82                 | 0.02                  | 0.02                 | 0.02                    | 0.02                   | 0.03             | 0.03            | —                |
| 2rm-2_24_62                 | -0.03                 | -0.03                | -0.04                   | -0.04                  | 0.07             | 0.07            | —                |
| 2rm-2_17_87                 | 1.48                  | 1.48                 | 1.54                    | 1.54                   | 1.86             | 1.86            | —                |
| 2rm-2_16_85                 | 1.50                  | 1.50                 | 1.60                    | 1.60                   | 1.98             | 1.98            | —                |
| 2rm-2_8_81                  | 2.35                  | 2.35                 | 2.28                    | 2.28                   | 2.17             | 2.17            | —                |
| 2rm-2_1_65                  | 2.86                  | 2.86                 | 2.85                    | 2.85                   | 3.33             | 3.33            | —                |
| 1rmltsm-11_31_51            | 6.23                  | 4.94                 | 5.04                    | 3.75                   | 4.88             | 3.59            | -94.45           |
| 1rmltsm-11_11_81            | 7.32                  | 6.03                 | 6.14                    | 4.85                   | 6.14             | 4.84            | -66.57           |
| 1rmltsm-11_29_95            | 8.03                  | 6.74                 | 7.01                    | 5.72                   | 7.17             | 5.87            | -157.84          |
| rd_IRC_sci                  | 1.60                  | 1.98                 | 1.64                    | 2.03                   | 1.63             | 2.02            | —                |
| pcd_IRC_sci                 | 5.99                  | 3.52                 | 4.40                    | 1.94                   | 3.14             | 0.67            | —                |
| ts_goatgfn1_24              | 8.37                  | 9.96                 | 6.87                    | 8.46                   | 8.28             | 9.86            | -727.37          |
| ts_goatgfn1_06              | 8.82                  | 10.41                | 7.09                    | 8.68                   | 8.28             | 9.87            | -1147.57         |
| ts_goatgfn1_34              | 9.00                  | 10.59                | 7.10                    | 8.69                   | 8.48             | 10.07           | -981.69          |
| ts_goatgfn1_15              | 8.68                  | 10.27                | 7.25                    | 8.84                   | 8.73             | 10.32           | -934.63          |

Continued on next page

Continued from previous page

| Conformer Name <sup>a</sup> | $\Delta E_{el}$ (DFT) | $\Delta E_{el}$ (CC) | $\Delta E_{elzc}$ (DFT) | $\Delta E_{elzc}$ (CC) | $\Delta G$ (DFT) | $\Delta G$ (CC) | $\omega_i$ (DFT) |
|-----------------------------|-----------------------|----------------------|-------------------------|------------------------|------------------|-----------------|------------------|
| ts_goatgfn1_10              | 9.34                  | 10.93                | 7.56                    | 9.15                   | 8.87             | 10.46           | -1139.15         |
| ts_goatgfn1_31              | 9.32                  | 10.91                | 7.64                    | 9.23                   | 8.95             | 10.54           | -694.61          |
| ts_goatgfn1_19              | 10.91                 | 12.50                | 8.85                    | 10.44                  | 9.69             | 11.28           | -1158.33         |
| ts_goatgfn1_14              | 11.06                 | 12.64                | 8.98                    | 10.57                  | 9.78             | 11.37           | -1180.19         |
| ts_goatgfn1_23              | 10.75                 | 12.34                | 8.73                    | 10.32                  | 9.79             | 11.38           | -1468.78         |
| ts_goatgfn1_29              | 10.67                 | 12.26                | 8.83                    | 10.42                  | 9.79             | 11.38           | -983.48          |
| ts_goatgfn1_13              | 10.94                 | 12.53                | 8.93                    | 10.52                  | 9.87             | 11.46           | -1276.04         |
| rd_IRC_Hshift               | 3.10                  | 3.34                 | 3.02                    | 3.26                   | 3.52             | 3.76            | —                |
| pcd_IRC_Hshift              | -27.89                | -26.98               | -26.22                  | -25.31                 | -25.54           | -24.63          | —                |

<sup>a</sup> Conformer names and their corresponding types are defined in Table S1. Additional labels include: "tsm" – TS monomer of the  $\beta$ -scission reaction, "1rm1tsm" – TS dimer of the  $\beta$ -scission reaction, "ts\_goatgfn1" – TS conformer of the intermolecular H-shift reaction, "sci" – conformer of the  $\beta$ -scission reaction, "H-shift" – conformer of the intermolecular H-shift reaction.

**Table S7** Relative energy values and imaginary frequencies of the conformers of the  $\beta$ -ISOPO system. Notations are defined in Table S1.

| Conformer Name <sup>a</sup> | $\Delta E_{el}$ (DFT) | $\Delta E_{el}$ (CC) | $\Delta E_{elzc}$ (DFT) | $\Delta E_{elzc}$ (CC) | $\Delta G$ (DFT) | $\Delta G$ (CC) | $\omega_i$ (DFT) |
|-----------------------------|-----------------------|----------------------|-------------------------|------------------------|------------------|-----------------|------------------|
| rm_goatgfn2_02              | 0.00                  | 0.00                 | 0.00                    | 0.00                   | 0.00             | 0.00            | —                |
| rm_goatgfn2_03              | 0.74                  | 0.74                 | 0.88                    | 0.88                   | 0.88             | 0.88            | —                |
| rm_goatgfn2_06              | 0.95                  | 0.95                 | 1.02                    | 1.02                   | 1.15             | 1.15            | —                |
| rm_goatgfn2_04              | 1.23                  | 1.23                 | 1.15                    | 1.15                   | 1.16             | 1.16            | —                |
| rm_goatgfn2_01              | 1.61                  | 1.61                 | 1.37                    | 1.37                   | 1.29             | 1.29            | —                |
| rm_goatgfn2_05              | 1.00                  | 1.00                 | 1.20                    | 1.20                   | 1.32             | 1.32            | —                |
| rm_goatgfn2_07              | 1.77                  | 1.77                 | 1.70                    | 1.70                   | 1.72             | 1.72            | —                |
| rm_goatgfn2_14              | 2.28                  | 2.28                 | 2.13                    | 2.13                   | 1.94             | 1.94            | —                |
| tsmOH_goatgfn2_03           | 6.25                  | 7.06                 | 4.87                    | 5.68                   | 4.64             | 5.45            | -401.47          |
| tsmOH_goatgfn2_04           | 6.69                  | 7.50                 | 5.35                    | 6.15                   | 5.14             | 5.94            | -403.95          |
| tsmOH_goatgfn2_01           | 6.98                  | 7.79                 | 5.53                    | 6.34                   | 5.33             | 6.14            | -402.79          |
| tsmOH_goatgfn2_05           | 6.68                  | 7.49                 | 5.40                    | 6.21                   | 5.37             | 6.18            | -337.59          |
| tsmOH_goatgfn2_02           | 7.13                  | 7.94                 | 5.74                    | 6.55                   | 5.55             | 6.35            | -403.73          |
| tsmOH_goatgfn2_06           | 7.67                  | 8.47                 | 6.35                    | 7.16                   | 6.21             | 7.01            | -338.09          |
| pcm_IRC_sciOH               | -5.49                 | -5.13                | -8.00                   | -7.65                  | -10.14           | -9.79           | —                |
| 2rm-2_255_2                 | 0.00                  | 0.00                 | 0.00                    | 0.00                   | 0.00             | 0.00            | —                |
| 2rm-2_331_9                 | 0.41                  | 0.41                 | 0.57                    | 0.57                   | 0.83             | 0.83            | —                |
| 2rm-2_320_6                 | 1.02                  | 1.02                 | 0.98                    | 0.98                   | 1.01             | 1.01            | —                |
| 2rm-2_220_9                 | 1.44                  | 1.44                 | 1.27                    | 1.27                   | 1.12             | 1.12            | —                |
| 2rm-2_215_6                 | 1.44                  | 1.44                 | 1.30                    | 1.30                   | 1.17             | 1.17            | —                |
| 2rm-2_214_1                 | 1.04                  | 1.04                 | 1.07                    | 1.07                   | 1.18             | 1.18            | —                |
| 2rm-2_231_5                 | 1.12                  | 1.12                 | 1.16                    | 1.16                   | 1.18             | 1.18            | —                |
| 2rm-2_231_8                 | 1.12                  | 1.12                 | 1.16                    | 1.16                   | 1.18             | 1.18            | —                |
| 2rm-2_211_4                 | 1.75                  | 1.75                 | 1.72                    | 1.72                   | 1.47             | 1.47            | —                |
| 2rm-2_217_3                 | 1.75                  | 1.75                 | 1.75                    | 1.75                   | 1.51             | 1.51            | —                |
| 2rm-2_156_4                 | 2.17                  | 2.17                 | 2.12                    | 2.12                   | 1.89             | 1.89            | —                |

Continued on next page

## Continued from previous page

| Conformer Name <sup>a</sup> | $\Delta E_{el}$ (DFT) | $\Delta E_{el}$ (CC) | $\Delta E_{elzc}$ (DFT) | $\Delta E_{elzc}$ (CC) | $\Delta G$ (DFT) | $\Delta G$ (CC) | $\omega_i$ (DFT) |
|-----------------------------|-----------------------|----------------------|-------------------------|------------------------|------------------|-----------------|------------------|
| 2rm-2_163_3                 | 2.06                  | 2.06                 | 2.13                    | 2.13                   | 2.04             | 2.04            | —                |
| 2rm-2_166_9                 | 2.06                  | 2.06                 | 2.14                    | 2.14                   | 2.05             | 2.05            | —                |
| 2rm-2_80_7                  | 2.18                  | 2.18                 | 1.97                    | 1.97                   | 2.09             | 2.09            | —                |
| 2rm-2_296_7                 | 2.18                  | 2.18                 | 1.98                    | 1.98                   | 2.11             | 2.11            | —                |
| 2rm-2_291_0                 | 2.18                  | 2.18                 | 2.00                    | 2.00                   | 2.16             | 2.16            | —                |
| 2rm-2_41_5                  | 2.13                  | 2.13                 | 2.09                    | 2.09                   | 2.26             | 2.26            | —                |
| 2rm-2_219_6                 | 3.21                  | 3.21                 | 2.95                    | 2.95                   | 2.32             | 2.32            | —                |
| 2rm-2_167_6                 | 2.57                  | 2.57                 | 2.60                    | 2.60                   | 2.32             | 2.32            | —                |
| 2rm-2_163_8                 | 2.58                  | 2.58                 | 2.60                    | 2.60                   | 2.34             | 2.34            | —                |
| 2rm-2_215_9                 | 3.21                  | 3.21                 | 2.98                    | 2.98                   | 2.38             | 2.38            | —                |
| 2rm-2_63_7                  | 3.23                  | 3.23                 | 2.76                    | 2.76                   | 2.51             | 2.51            | —                |
| 2rm-2_61_5                  | 3.23                  | 3.23                 | 2.79                    | 2.79                   | 2.56             | 2.56            | —                |
| 2rm-2_212_9                 | 2.99                  | 2.99                 | 2.92                    | 2.92                   | 2.64             | 2.64            | —                |
| 2rm-2_24_7                  | 2.78                  | 2.78                 | 2.65                    | 2.65                   | 2.77             | 2.77            | —                |
| 1rmltsm-11_384_6            | 2.05                  | 2.14                 | 1.21                    | 1.30                   | 1.30             | 1.39            | -286.31          |
| 1rmltsm-11_239_9            | 2.75                  | 2.84                 | 1.85                    | 1.94                   | 2.14             | 2.22            | -271.08          |
| 1rmltsm-11_373_8            | 5.28                  | 5.37                 | 4.13                    | 4.21                   | 4.04             | 4.13            | -293.10          |
| 1rmltsm-11_380_4            | 5.28                  | 5.37                 | 4.13                    | 4.21                   | 4.06             | 4.14            | -292.58          |
| 1rmltsm-11_14_3             | 5.49                  | 5.57                 | 4.25                    | 4.34                   | 4.27             | 4.36            | -246.59          |
| 1rmltsm-11_363_6            | 5.84                  | 5.93                 | 4.70                    | 4.79                   | 4.37             | 4.46            | -284.13          |
| 1rmltsm-11_361_9            | 5.84                  | 5.93                 | 4.73                    | 4.82                   | 4.42             | 4.50            | -283.47          |
| 1rmltsm-11_74_6             | 6.45                  | 6.54                 | 5.16                    | 5.24                   | 4.86             | 4.94            | -262.54          |
| 1rmltsm-11_135_4            | 6.05                  | 6.14                 | 4.87                    | 4.96                   | 4.88             | 4.97            | -259.95          |
| 1rmltsm-11_74_3             | 6.45                  | 6.54                 | 5.18                    | 5.27                   | 4.91             | 4.99            | -262.88          |
| 1rmltsm-11_424_8            | 6.17                  | 6.26                 | 4.90                    | 4.99                   | 4.99             | 5.08            | -273.05          |
| 1rmltsm-11_71_6             | 6.73                  | 6.82                 | 5.39                    | 5.47                   | 5.06             | 5.15            | -258.10          |
| 1rmltsm-11_431_5            | 6.22                  | 6.31                 | 4.96                    | 5.05                   | 5.06             | 5.15            | -284.31          |
| 1rmltsm-11_437_8            | 6.23                  | 6.32                 | 5.00                    | 5.08                   | 5.09             | 5.18            | -284.95          |
| 1rmltsm-11_309_9            | 6.66                  | 6.75                 | 5.53                    | 5.62                   | 5.13             | 5.22            | -282.30          |
| 1rmltsm-11_310_7            | 5.71                  | 5.79                 | 4.94                    | 5.03                   | 5.16             | 5.24            | -286.39          |
| 1rmltsm-11_301_3            | 6.66                  | 6.74                 | 5.57                    | 5.65                   | 5.18             | 5.26            | -281.86          |
| 1rmltsm-11_304_3            | 5.71                  | 5.80                 | 4.97                    | 5.06                   | 5.18             | 5.27            | -286.31          |
| 1rmltsm-11_302_9            | 6.65                  | 6.73                 | 5.56                    | 5.64                   | 5.19             | 5.28            | -282.61          |
| 1rmltsm-11_1_5              | 6.79                  | 6.87                 | 5.38                    | 5.47                   | 5.21             | 5.30            | -247.72          |
| 1rmltsm-11_311_7            | 6.23                  | 6.32                 | 5.16                    | 5.25                   | 5.22             | 5.31            | -293.02          |
| 1rmltsm-11_10_6             | 5.99                  | 6.08                 | 5.01                    | 5.10                   | 5.43             | 5.52            | -243.03          |
| 1rmltsm-11_67_6             | 7.47                  | 7.55                 | 6.10                    | 6.19                   | 5.68             | 5.77            | -254.25          |
| 1rmltsm-11_4_4              | 7.64                  | 7.73                 | 6.29                    | 6.38                   | 5.76             | 5.84            | -247.52          |
| 1rmltsm-11_61_9             | 7.25                  | 7.33                 | 6.08                    | 6.16                   | 6.05             | 6.14            | -257.86          |
| 1rmltsm-11_1_7              | 7.78                  | 7.87                 | 6.40                    | 6.49                   | 6.06             | 6.15            | -259.16          |
| rd_IRC_sciOH                | 0.01                  | 0.00                 | 0.00                    | -0.02                  | 0.00             | -0.02           | —                |
| pcd_IRC_sciOH               | -3.81                 | -4.18                | -6.47                   | -6.83                  | -8.60            | -8.96           | —                |

<sup>a</sup> Conformer names and their corresponding types are defined in Table S1. Additional labels include: "tsOH" – TS monomer of the  $\beta$ -scission reaction from the hydroxymethyl side, "1rmltsm" – TS dimer of the  $\beta$ -scission reaction from the hydroxymethyl side, "sciOH" – conformers of the  $\beta$ -scission reaction from the hydroxymethyl side.

**Table S8** Relative energy values and imaginary frequencies of the conformers involved in epoxy formation and intermolecular H-shift reactions of the PhCH<sub>2</sub>O system. Notations are defined in Table S1.

| Conformer Name <sup>a</sup> | $\Delta E_{\text{el}}$ (DFT) | $\Delta E_{\text{el}}$ (CC) | $\Delta E_{\text{elzc}}$ (DFT) | $\Delta E_{\text{elzc}}$ (CC) | $\Delta G$ (DFT) | $\Delta G$ (CC) | $\omega_i$ (DFT)          |
|-----------------------------|------------------------------|-----------------------------|--------------------------------|-------------------------------|------------------|-----------------|---------------------------|
| rm_Gmin                     | 0.00                         | 0.00                        | 0.00                           | 0.00                          | 0.00             | 0.00            | —                         |
| rm_IRC_EPO                  | 1.69                         | 0.99                        | 2.64                           | 1.93                          | 2.64             | 1.93            | —                         |
| tsmEPO                      | 12.99                        | 11.43                       | 12.86                          | 11.30                         | 13.43            | 11.87           | -535.42                   |
| epom <sup>b</sup>           | 10.35                        | 9.95                        | 10.67                          | 10.27                         | 11.23            | 10.83           | —                         |
| 2rm-2_8_83                  | 0.00                         | 0.00                        | 0.00                           | 0.00                          | 0.00             | 0.00            | —                         |
| 2rm-2_10_87                 | -0.14                        | -0.14                       | -0.22                          | -0.22                         | 0.17             | 0.17            | —                         |
| 2rm-2_7_79                  | -0.14                        | -0.14                       | -0.20                          | -0.20                         | 0.21             | 0.21            | —                         |
| 1rm1tsepo-11_1_41           | 13.19                        | 11.75                       | 12.56                          | 11.13                         | 12.85            | 11.42           | -489.73                   |
| 1rm1tsepo-11_3_45           | 13.20                        | 11.76                       | 12.60                          | 11.16                         | 13.20            | 11.76           | -490.92                   |
| 1rm1tsepo-11_1_89           | 13.18                        | 11.74                       | 12.57                          | 11.13                         | 13.32            | 11.88           | -489.52                   |
| 1rm1tsepo-11_1_58           | 13.19                        | 11.75                       | 12.59                          | 11.15                         | 13.36            | 11.92           | -489.71                   |
| 1rm1tsepo-11_1_29           | 14.07                        | 12.63                       | 13.72                          | 12.28                         | 14.27            | 12.84           | -503.71                   |
| 1rm1tsepo-11_9_76           | 14.16                        | 12.73                       | 13.85                          | 12.41                         | 14.56            | 13.12           | -507.49                   |
| 1rm1tsepo-11_6_77           | 14.16                        | 12.72                       | 13.86                          | 12.42                         | 14.61            | 13.17           | -507.95                   |
| rd_IRC_EPO                  | 2.67                         | 2.31                        | 3.11                           | 2.75                          | 3.14             | 2.78            | —                         |
| eporm_IRC_EPO               | 11.64                        | 11.21                       | 11.46                          | 11.02                         | 11.92            | 11.48           | —                         |
| ts_goatgfn1_01              | 8.95                         | 9.52                        | 7.40                           | 7.96                          | 8.88             | 9.44            | -1198.18                  |
| ts_goatgfn1_02              | 9.28                         | 9.85                        | 7.57                           | 8.14                          | 9.01             | 9.58            | -1234.69                  |
| ts_goatgfn1_04              | 10.03                        | 10.59                       | 8.37                           | 8.94                          | 9.30             | 9.87            | -957.56                   |
| rd_IRC_Hshift               | 4.62                         | 4.10                        | 3.93                           | 3.41                          | 4.83             | 4.31            | -9.59, -7.18 <sup>c</sup> |
| pcd_IRC_Hshift <sup>d</sup> | -18.04                       | -20.77                      | -17.03                         | -19.77                        | -16.82           | -19.55          | —                         |

<sup>a</sup> Conformer names and their corresponding types are defined as follows: "rm" – reactant monomer (isolated PhCH<sub>2</sub>O<sup>\*</sup>), "tsmEPO" – TS monomer of the epoxy formation reaction, "2rm" – reactant dimer (<sup>3</sup>(PhCH<sub>2</sub>O · · OCH<sub>2</sub>Ph)), "1rm1tsepo" – TS dimer of the epoxy formation reaction, "IRC\_EPO" – conformer obtained from IRC calculations of epoxy formation TS conformers, "ts\_goatgfn1" – TS conformer of the intermolecular H-shift reaction.

<sup>b</sup> The isolated epoxy radical obtained from IRC has the same geometry as the one identified in the sampling workflow (RMSD < 0.01 Å).

<sup>c</sup> The imaginary frequencies were likely to be caused by numerical noise, which should not influence the tunneling coefficient and relative energy calculations significantly.

<sup>d</sup> Results calculated using a UHF-type wavefunction generated from the ROHF-type orbitals, followed by coupled-cluster steps. Results calculated from the "pure-UHF" procedure are listed in Table S4.

**Table S9** Relative energy values and imaginary frequencies of the conformers involved in the epoxy decomposition reaction of the PhCH<sub>2</sub>O system. Notations are defined in Table S1.

| Conformer Name <sup>a</sup> | $\Delta E_{\text{el}}$ (DFT) | $\Delta E_{\text{el}}$ (CC) | $\Delta E_{\text{elzc}}$ (DFT) | $\Delta E_{\text{elzc}}$ (CC) | $\Delta G$ (DFT) | $\Delta G$ (CC) | $\omega_i$ (DFT) |
|-----------------------------|------------------------------|-----------------------------|--------------------------------|-------------------------------|------------------|-----------------|------------------|
| epom <sup>b</sup>           | 0.00                         | 0.00                        | 0.00                           | 0.00                          | 0.00             | 0.00            | —                |
| tsmISO                      | 10.79                        | 9.39                        | 9.54                           | 8.13                          | 9.48             | 8.07            | -712.20          |
| pcm_IRC_ISO                 | -10.79                       | -11.11                      | -10.86                         | -11.17                        | -11.23           | -11.55          | —                |
| 1epo1rm-11_1_50             | 0.00                         | 0.00                        | 0.00                           | 0.00                          | 0.00             | 0.00            | —                |
| 1epo1rm-11_6_61             | 0.00                         | 0.00                        | -0.01                          | -0.01                         | 0.05             | 0.05            | —                |
| 1epo1rm-11_10_85            | 0.00                         | 0.00                        | 0.03                           | 0.03                          | 0.11             | 0.11            | —                |

Continued on next page

Continued from previous page

| Conformer Name <sup>a</sup> | $\Delta E_{el}$ (DFT) | $\Delta E_{el}$ (CC) | $\Delta E_{elzc}$ (DFT) | $\Delta E_{elzc}$ (CC) | $\Delta G$ (DFT) | $\Delta G$ (CC) | $\omega_1$ (DFT) |
|-----------------------------|-----------------------|----------------------|-------------------------|------------------------|------------------|-----------------|------------------|
| 1epo1rm-11_4_69             | 0.00                  | 0.00                 | 0.02                    | 0.02                   | 0.15             | 0.15            | —                |
| 1epo1rm-11_10_39            | 0.07                  | 0.07                 | 0.19                    | 0.19                   | 0.20             | 0.20            | —                |
| 1epo1rm-11_5_40             | 0.06                  | 0.06                 | 0.20                    | 0.20                   | 0.26             | 0.26            | —                |
| 1epo1rm-11_6_20             | 0.06                  | 0.06                 | 0.18                    | 0.18                   | 0.26             | 0.26            | —                |
| 1epo1rm-11_1_37             | 0.50                  | 0.50                 | 0.77                    | 0.77                   | 0.76             | 0.76            | —                |
| 1epo1rm-11_3_97             | 0.51                  | 0.51                 | 0.80                    | 0.80                   | 0.79             | 0.79            | —                |
| 1epo1rm-11_10_29            | 0.64                  | 0.64                 | 0.97                    | 0.97                   | 1.10             | 1.10            | —                |
| 1epo1rm-11_5_44             | 0.71                  | 0.71                 | 0.97                    | 0.97                   | 1.12             | 1.12            | —                |
| 1epo1rm-11_5_38             | 0.64                  | 0.64                 | 0.98                    | 0.98                   | 1.13             | 1.13            | —                |
| 1rm1tsiso-11_4_75           | 10.88                 | 9.32                 | 9.72                    | 8.16                   | 9.77             | 8.21            | -698.03          |
| 1rm1tsiso-11_1_99           | 10.89                 | 9.33                 | 9.85                    | 8.29                   | 9.81             | 8.25            | -700.48          |
| 1rm1tsiso-11_6_83           | 10.89                 | 9.33                 | 9.90                    | 8.34                   | 10.01            | 8.45            | -700.67          |
| 1rm1tsiso-11_4_55           | 11.22                 | 9.66                 | 10.12                   | 8.56                   | 10.06            | 8.50            | -701.29          |
| 1rm1tsiso-11_2_37           | 11.55                 | 9.99                 | 10.38                   | 8.82                   | 10.28            | 8.72            | -707.34          |
| 1rm1tsiso-11_3_92           | 11.90                 | 10.34                | 10.73                   | 9.17                   | 10.51            | 8.95            | -710.61          |
| 1rm1tsiso-11_1_92           | 11.83                 | 10.27                | 10.65                   | 9.08                   | 10.61            | 9.05            | -714.89          |
| 1rm1tsiso-11_8_74           | 11.96                 | 10.40                | 10.93                   | 9.36                   | 10.80            | 9.24            | -713.74          |
| 1rm1tsiso-11_4_88           | 11.91                 | 10.35                | 10.87                   | 9.31                   | 10.82            | 9.26            | -713.82          |
| 1rm1tsiso-11_8_92           | 11.90                 | 10.34                | 10.88                   | 9.32                   | 10.87            | 9.31            | -713.10          |
| 1rm1tsiso-11_9_97           | 11.91                 | 10.35                | 10.89                   | 9.33                   | 10.88            | 9.32            | -712.63          |
| 1rm1tsiso-11_1_11           | 12.08                 | 10.52                | 11.11                   | 9.55                   | 11.26            | 9.70            | -709.12          |
| eporm_IRC_ISO               | 0.72                  | 0.69                 | 0.73                    | 0.70                   | 0.36             | 0.34            | —                |
| pcd_IRC_ISO                 | -10.83                | -11.06               | -10.57                  | -10.80                 | -10.62           | -10.85          | —                |

<sup>a</sup> Conformer names and their corresponding types are defined as follows: "epom" – isolated epoxy radical, "tsmISO" – TS monomer of the epoxy decomposition reaction, "1epo1rm" or "eporm" –<sup>3</sup>(Epoxy ··· OCH<sub>2</sub>Ph) complex, "1rm1tsiso" – TS dimer of the epoxy decomposition reaction, "IRC\_ISO" – conformer obtained from IRC calculations of epoxy decomposition TS conformers.

<sup>b</sup> The isolated epoxy radical obtained from IRC has the same geometry as the one identified in the sampling workflow (RMSD < 0.01 Å).

**Table S10** Relative energy values and imaginary frequencies of the conformers of the PhC(O)O system. Notations are defined in Table S1.

| Conformer Name <sup>a</sup> | $\Delta E_{el}$ (DFT) | $\Delta E_{el}$ (CC) | $\Delta E_{elzc}$ (DFT) | $\Delta E_{elzc}$ (CC) | $\Delta G$ (DFT) | $\Delta G$ (CC) | $\omega_1$ (DFT) |
|-----------------------------|-----------------------|----------------------|-------------------------|------------------------|------------------|-----------------|------------------|
| rm <sup>b</sup>             | 0.00                  | 0.00                 | 0.00                    | 0.00                   | 0.00             | 0.00            | —                |
| tsm                         | 9.35                  | 7.85                 | 8.03                    | 6.53                   | 7.53             | 6.03            | -217.81          |
| pcm_IRC_sci                 | -1.69                 | -5.04                | -2.89                   | -6.23                  | -5.21            | -8.55           | —                |
| 2rm-2_9_47                  | 0.00                  | 0.00                 | 0.00                    | 0.00                   | 0.00             | 0.00            | —                |
| 2rm-2_8_90                  | -0.01                 | -0.01                | 0.00                    | 0.00                   | 0.17             | 0.17            | —                |
| 2rm-2_8_5                   | 0.00                  | 0.00                 | 0.01                    | 0.01                   | 0.20             | 0.20            | —                |
| 2rm-2_3_8                   | 0.01                  | 0.01                 | 0.01                    | 0.01                   | 0.22             | 0.22            | —                |
| 2rm-2_10_15                 | 0.03                  | 0.03                 | 0.05                    | 0.05                   | 0.26             | 0.26            | —                |
| 2rm-2_10_78                 | 0.00                  | 0.00                 | 0.04                    | 0.04                   | 0.30             | 0.30            | —                |
| 2rm-2_10_3                  | 0.02                  | 0.02                 | 0.04                    | 0.04                   | 0.34             | 0.34            | —                |

Continued on next page

## Continued from previous page

| Conformer Name <sup>a</sup> | $\Delta E_{el}$ (DFT) | $\Delta E_{el}$ (CC) | $\Delta E_{elzc}$ (DFT) | $\Delta E_{elzc}$ (CC) | $\Delta G$ (DFT) | $\Delta G$ (CC) | $\omega_i$ (DFT)           |
|-----------------------------|-----------------------|----------------------|-------------------------|------------------------|------------------|-----------------|----------------------------|
| 2rm-2_4_16                  | 0.03                  | 0.03                 | 0.05                    | 0.05                   | 0.37             | 0.37            | —                          |
| 2rm-2_1_67                  | 0.15                  | 0.15                 | 0.20                    | 0.20                   | 0.53             | 0.53            | —                          |
| 1rmltsm-11_5_92             | 9.62                  | 8.12                 | 8.37                    | 6.87                   | 7.90             | 6.40            | -215.23                    |
| 1rmltsm-11_3_96             | 9.60                  | 8.10                 | 8.35                    | 6.86                   | 8.09             | 6.59            | -216.28                    |
| 1rmltsm-11_4_45             | 9.68                  | 8.18                 | 8.44                    | 6.94                   | 8.36             | 6.87            | -226.55                    |
| 1rmltsm-11_7_88             | 9.64                  | 8.14                 | 8.42                    | 6.92                   | 8.38             | 6.89            | -220.43                    |
| 1rmltsm-11_10_56            | 9.66                  | 8.16                 | 8.41                    | 6.91                   | 8.49             | 6.99            | -221.92                    |
| 1rmltsm-11_3_6              | 9.64                  | 8.15                 | 8.44                    | 6.94                   | 8.58             | 7.08            | -223.72                    |
| 1rmltsm-11_1_25             | 9.70                  | 8.20                 | 8.46                    | 6.96                   | 8.67             | 7.17            | -227.37                    |
| rd_IRC_sci                  | 3.79                  | 1.84                 | 3.55                    | 1.61                   | 3.54             | 1.60            | -6.78 <sup>c</sup>         |
| pcd_IRC_sci                 | 3.98                  | -0.88                | 2.55                    | -2.31                  | 0.65             | -4.21           | -10.48, -9.36 <sup>c</sup> |

<sup>a</sup> Conformer names and their corresponding types are defined in Table S1. Additional labels include: "tsm" – TS monomer of the  $\beta$ -scission reaction, "1rmltsm" – TS dimer of the  $\beta$ -scission reaction, "sci" – conformer of the  $\beta$ -scission reaction.

<sup>b</sup> The reactant monomer obtained from IRC showed nonphysical imaginary frequencies after DFT optimization. Instead, a reactant monomer with the same geometry (RMSD = 0.09 Å) was used here.

<sup>c</sup> The imaginary frequencies were likely to be caused by numerical noise, which should not influence the tunneling coefficient and relative energy calculations significantly.

## S6 Supporting data for the AceO system

### S6.1 Energy barriers of post- $\beta$ -scission processes

We propose that, on the triplet surface, from the  $\beta$ -scission reaction of  $^3(\text{AceO} \cdots \text{OAce})$  to the formation of acetyl acetate ( $^3\text{CH}_3\text{C}(\text{O})\text{OCH}_2\text{C}(\text{O})\text{CH}_3$ , or  $^3(\text{C}_5\text{H}_8\text{O}_3)$ ) include the following three steps:

1.  $^3(\text{AceO} \cdots \text{OAce}) \xrightarrow{\beta\text{-scission}} ^3(\text{CH}_3\text{C}(\text{O}) \cdots \text{CH}_2\text{O} \cdots \text{OAce})$
2.  $^3(\text{CH}_3\text{C}(\text{O}) \cdots \text{CH}_2\text{O} \cdots \text{OAce}) \rightarrow ^3(\text{CH}_3\text{C}(\text{O}) \cdots \text{OAce}) + \text{CH}_2\text{O}$
3.  $^3(\text{CH}_3\text{C}(\text{O}) \cdots \text{OAce}) \xrightarrow{\text{recombination}} ^3\text{CH}_3\text{C}(\text{O})\text{OCH}_2\text{C}(\text{O})\text{CH}_3$

We then constructed the key conformers in Step 3, optimized their structures at  $\omega\text{B97X-D3}$  (Grid3) level of theory. Relative energy values with respect to  $^3(\text{CH}_3\text{C}(\text{O}) \cdots \text{OAce})$  are listed in Table S11.

**Table S11** Relative energies of key conformers of Step 3 in  $\text{kcal mol}^{-1}$ . Notations are defined in Table S1.

| Species                                                | $\Delta E_{\text{el}}$ (DFT) | $\Delta E_{\text{elzc}}$ (DFT) | $\Delta G$ (DFT) |
|--------------------------------------------------------|------------------------------|--------------------------------|------------------|
| $^3(\text{CH}_3\text{C}(\text{O}) \cdots \text{OAce})$ | 0.00                         | 0.00                           | 0.00             |
| TS of recombination                                    | 17.44                        | 19.20                          | 21.21            |
| $^3(\text{C}_5\text{H}_8\text{O}_3)$                   | -11.55                       | -7.78                          | -5.46            |

### S6.2 Comparison between the TS H-shift conformers reported in this and previous studies

To compare the best ( $G_{\text{min}}$ ) TS conformer of the intermolecular H-shift reaction in  $^3(\text{AceO} \cdots \text{OAce})$ , we computed the energy difference between the conformer identified by our conformer sampling workflow and the one reported by Hasan et al.<sup>11</sup>. The energy difference values were calculated using Equation 7:

$$\Delta E = E(\text{TS (Hasan et al.)}) - E(\text{TS } (G_{\text{min}})) \quad (7)$$

where  $E$  refers to energy terms defined in Table S1, including  $E_{\text{el}}$ ,  $E_{\text{elzc}}$  and  $G$ . The initial structure of "TS (Hasan et al.)" was extracted from the publication, and then optimized at the  $\omega\text{B97X-D3/ma-def2-TZVP}$  (Grid3) level.

The  $\Delta E$  values are reported in  $\text{kcal mol}^{-1}$  in Table S12, as well as the imaginary frequencies in  $\text{cm}^{-1}$ .

**Table S12** Relative energy values and imaginary frequencies of the best ( $G_{\text{min}}$ ) TS H-shift conformers for the AceO system suggested by two studies. Notations are defined in Table S1.

| Source of conformer                 | $\Delta E_{\text{el}}$ (DFT) | $\Delta E_{\text{elzc}}$ (DFT) | $\Delta G$ (DFT) | $\omega_i$ (DFT) |
|-------------------------------------|------------------------------|--------------------------------|------------------|------------------|
| This study                          | 0.00                         | 0.00                           | 0.00             | -727.37          |
| Study by Hasan et al. <sup>11</sup> | 2.58                         | 2.05                           | 1.58             | -1277.65         |

## S7 Supporting data for the $\beta$ -ISOPO system

### S7.1 Energy barriers of possible reaction channels

As discussed in Section 3.2 of the main text, we computed the energy barriers of five possible pathways of the  $\beta$ -ISOPO system (see Figure 3) before applying the systematic conformer sampling workflow. Relevant conformers were optimized at the  $\omega$ B97X-D3 (Grid3) level of theory, and the energy barriers were calculated using the following equation:

$$\Delta_b E = E_{\text{TS}} - E_{\text{Reactant}} \quad (8)$$

where  $E$  refers to energy terms including  $E_{\text{el}}$ ,  $E_{\text{elzc}}$  and  $G$ . For the three  $\beta$ -scission reactions (R<sub>m</sub>3.2.1 – R<sub>m</sub>3.2.3 in Figure 3), the same reactant monomer was selected to compute the energy barriers. Similarly, the same reactant dimer was selected for the two double bond addition reactions (R3.2.2 (a) and R3.2.2 (b) in Figure 3).

**Table S13** Energy barriers of possible reaction pathways for the  $\beta$ -ISOPO system, reported in kcal mol<sup>-1</sup>. Notations are defined in Table S1.

| Reaction                                                              | $\Delta_b E_{\text{el}}$ (DFT) | $\Delta_b E_{\text{elzc}}$ (DFT) | $\Delta_b G$ (DFT) |
|-----------------------------------------------------------------------|--------------------------------|----------------------------------|--------------------|
| R <sub>m</sub> 3.2.1 ( $\beta$ -scission from the hydroxymethyl side) | 5.46                           | 3.89                             | 3.70               |
| R <sub>m</sub> 3.2.2 ( $\beta$ -scission from the methyl side)        | 14.31                          | 11.99                            | 11.73              |
| R <sub>m</sub> 3.2.3 ( $\beta$ -scission from the ethenyl side)       | 25.98                          | 22.78                            | 21.96              |
| R3.2.2 (a) (double bond addition at the $\beta$ position)             | 8.35                           | 9.10                             | 10.79              |
| R3.2.2 (b) (double bond addition at the $\gamma$ position)            | 8.03                           | 8.72                             | 10.29              |

## S7.2 Hydrogen bonds in isolated $\beta$ -ISOPO' and in the complex

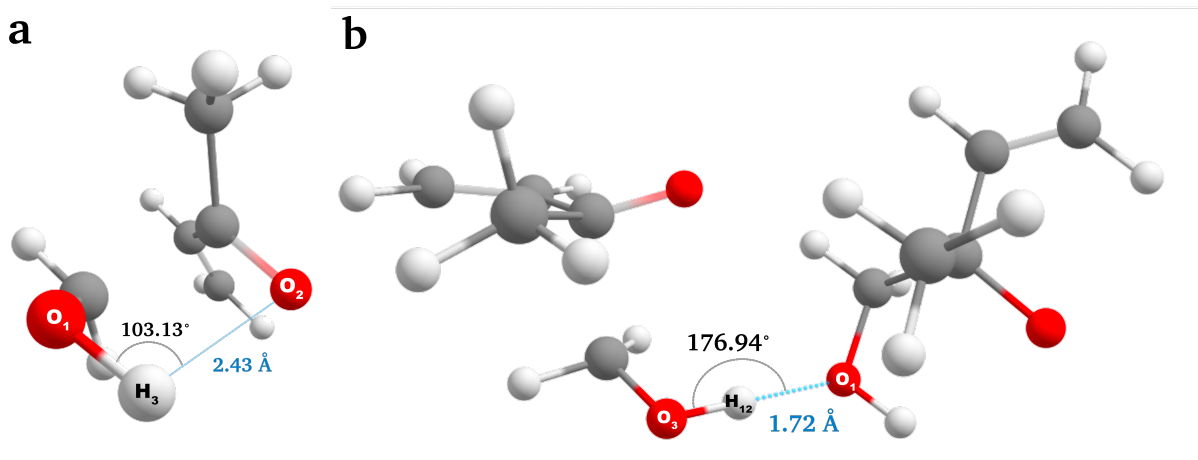

**Figure S2** The TS monomer (a) and dimer (b) of the  $\beta$ -ISOPO system for the  $\beta$ -scission reaction from the hydroxymethyl side. Both 3D structures presented here are conformers with the lowest  $G$  after the  $\omega$ B97X-D3 (Grid3) optimization and filtering. Color coding: gray for C, white for H, and red for O.

From Figure S2, the hydrogen bond in the TS monomer shows  $d(O_2 \cdots H_3) = 2.426 \text{ \AA}$ ,  $\angle O_1 H_3 O_2 = 103.13^\circ$ . On the other hand, the hydrogen bond in the TS dimer shows  $d(O_1 \cdots H_{12}) = 1.716 \text{ \AA}$ ,  $\angle O_3 H_{12} O_1 = 176.94^\circ$ . Based on their geometries, the hydrogen bond in the TS dimer is stronger than that in the TS monomer.

## References

- [1] T. J. Lee and P. R. Taylor, *International Journal of Quantum Chemistry*, 1989, **36**, 199–207.
- [2] F. Jensen, *Introduction to computational chemistry*, John Wiley & Sons, 2017.
- [3] R. Izsák, A. V. Ivanov, N. S. Blunt, N. Holzmann and F. Neese, *Journal of Chemical Theory and Computation*, 2023, **19**, 2703–2720.
- [4] W. Jiang, N. J. DeYonker and A. K. Wilson, *Journal of chemical theory and computation*, 2012, **8**, 460–468.
- [5] A. Karton, E. Rabinovich, J. M. L. Martin and B. Ruscic, *The Journal of Chemical Physics*, 2006, **125**, 144108.
- [6] A. Karton, S. Daon and J. M. Martin, *Chemical Physics Letters*, 2011, **510**, 165–178.
- [7] P. Cassam-Chenaï, *Theoretical Chemistry Accounts*, 2015, **134**, 125.
- [8] S. Goel and A. E. Masunov, *Computational Science – ICCS 2009*, Berlin, Heidelberg, 2009, pp. 141–150.
- [9] F. Neese *et al.*, *ORCA 6.0 Manual Section 7.6: Choice of Initial Guess and Restart of SCF Calculations*, 2024, <https://www.faccts.de/docs/orca/6.0/manual/contents/detailed/initguess.html>, Accessed March 2026.
- [10] A. C. Vaucher and M. Reiher, *Journal of chemical theory and computation*, 2017, **13**, 1219–1228.
- [11] G. Hasan, V.-T. Salo, R. R. Valiev, J. Kubecka and T. Kurtén, *The Journal of Physical Chemistry A*, 2020, **124**, 8305–8320.
